# Supplementary material for: A self-defense hierarchical antibacterial surface with inherent antifouling and bacteria-activated bactericidal properties for infection resistance
Source: Royal Society of Chemistry journal article supplement (doi:10.1039/d1bm01952j), 2022-01-01
Supplement: d1bm01952j1.pdf [file d1bm01952j1.pdf]

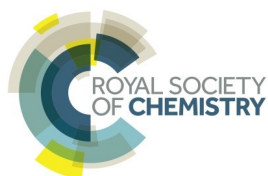

## Supporting Information

### **A Self-defense Hierarchical Antibacterial Surface with Inherent Antifouling and Bacteria-activated Bactericidal Properties for Infection Resistance**

Lu Wang<sup>a,b,c</sup>, Liwei Sun<sup>b</sup>, Xu Zhang<sup>b</sup>, Huiyan Wang<sup>a,c\*</sup>, Lingjie Song<sup>b\*</sup> and Shifang Luan<sup>b</sup>

<sup>a</sup> Jilin Agricultural University, School of Life Science, Changchun 130118, P. R. China

<sup>b</sup> State Key Laboratory of Polymer Physics and Chemistry, Changchun Institute of Applied Chemistry, Chinese Academy of Sciences, Changchun 130022, P. R. China.

<sup>c</sup> Jilin Medical University, Jilin 132013, P. R. China

\*Corresponding contributor. E-mail: [jlmcpwhy@163.com](mailto:jlmcpwhy@163.com); [songlj@ciac.ac.cn](mailto:songlj@ciac.ac.cn)

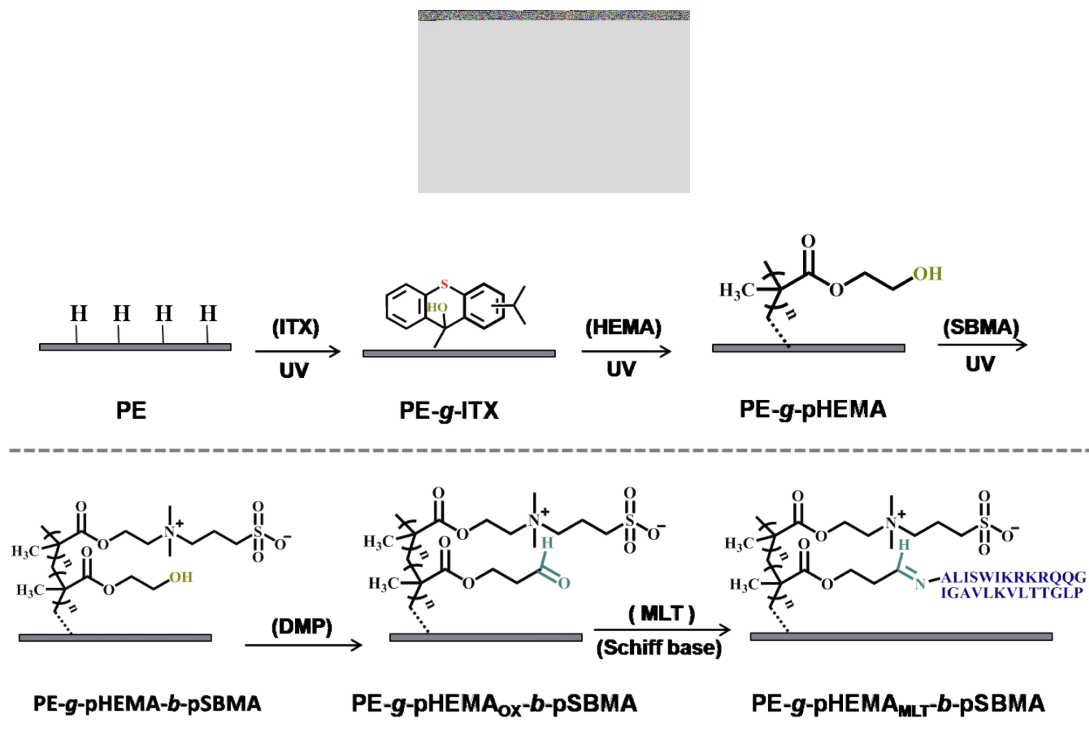

**ITX:** Isopropyl thioxanthone

**HEMA :** 2-hydroxyethyl methacrylate

**MLT :** melittin

**DMP:** DESS-Martin periodinane

**SBMA :** [2-(methacryloyloxy) ethyl] dimethyl-(3-sulfopropyl)

**Figure S1.** Schematic diagram of the synthesis route of a pH responsive hierarchical antibacterial surface on PE matrix.

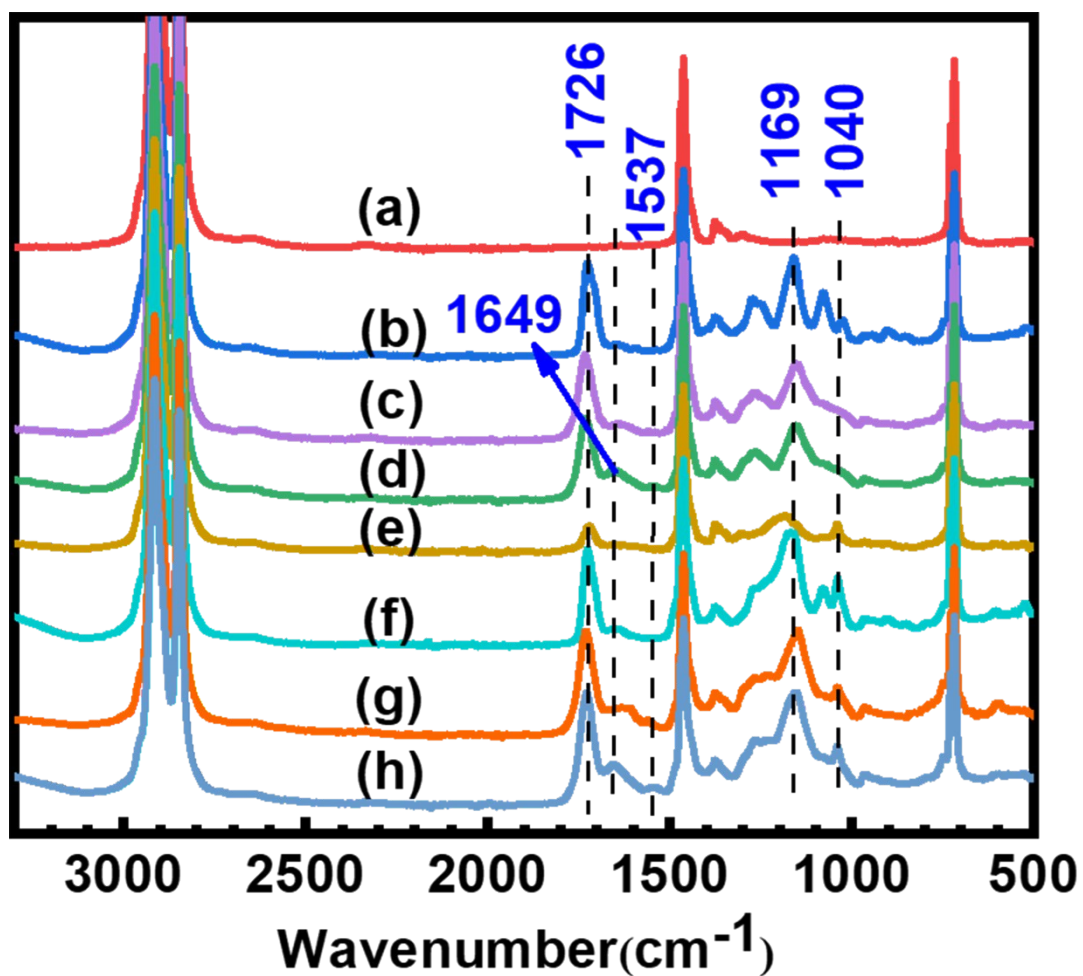

**Figure S2.** ATR-FTIR spectra of the sample surfaces: (a) pristine PE surface, (b) PE-g-pHEMA, (c) PE-g-pHEMA<sub>OX</sub>, (d) PE-g-pHEMA<sub>MLT</sub>, (e) PE-g-pSBMA, (f) PE-g-pHEMA-*b*-pSBMA, (g) PE-g-pHEMA<sub>OX</sub>-*b*-pSBMA and (h) PE-g-pHEMA<sub>MLT</sub>-*b*-pSBMA.

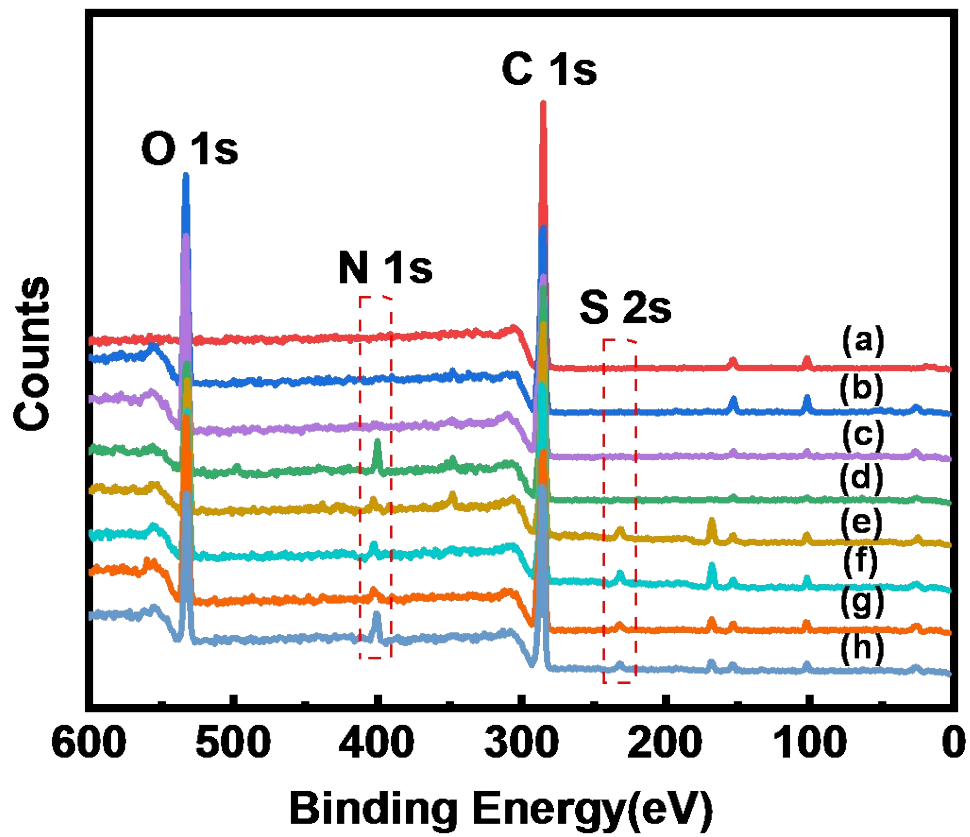

**Figure S3.** XPS analysis of different sample surfaces: (a) pristine PE surface, (b) PE-g-pHEMA, (c) PE-g-pHEMA<sub>OX</sub>, (d) PE-g-pHEMA<sub>MLT</sub>, (e) PE-g-pSBMA, (f) PE-g-pHEMA-*b*-pSBMA, (g) PE-g-pHEMA<sub>OX</sub>-*b*-pSBMA and (h) PE-g-pHEMA<sub>MLT</sub>-*b*-pSBMA.

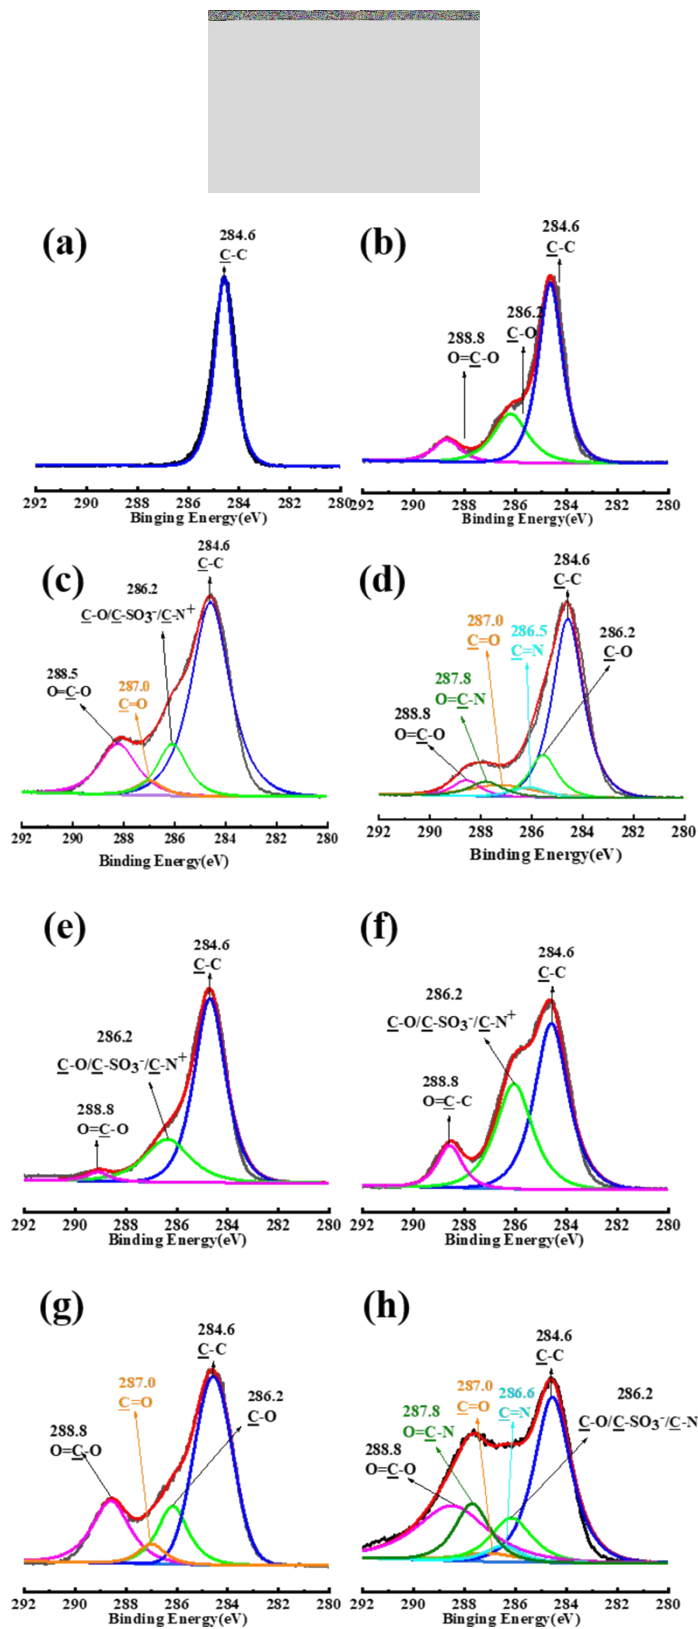

**Figure S4.** High-resolution C 1s XPS spectra and their peak-fitting curves of the samples: (a) PE, (b) PE-g-pHEMA, (c) PE-g-pHEMA<sub>OX</sub>, (d) PE-g-pHEMA<sub>MLT</sub>, (e) PE-g-pSBMA, (f) PE-g-pHEMA-*b*-pSBMA, (g) PE-g-pHEMA<sub>OX</sub>-*b*-pSBMA, (h) PE-

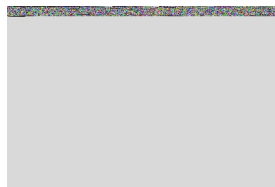

$g$ -pHEMA<sub>MLT</sub>- $b$ -pSBMA.

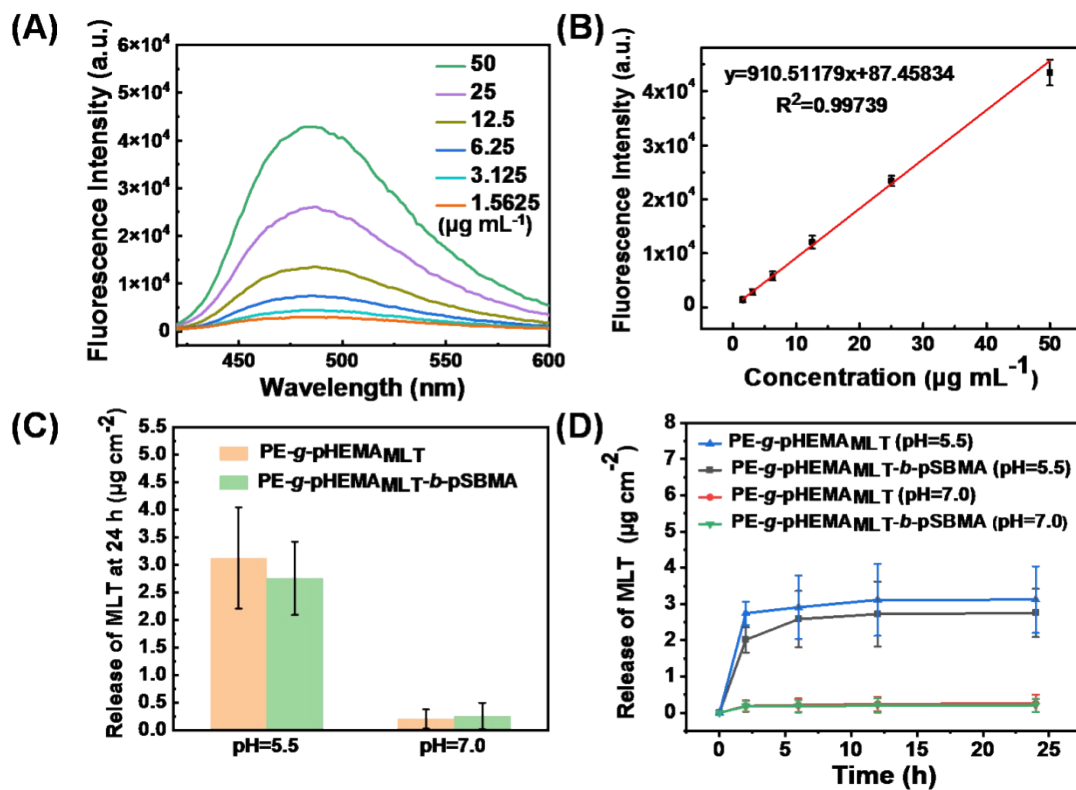

**Figure S5.** (A) The fluorescence adsorption curves of fluorescamine after reacting with MLT at different concentrations ranging from 1.5625  $\mu\text{g mL}^{-1}$  to 50  $\mu\text{g mL}^{-1}$ . (B) The linear relations of fluorescence intensity as a function of MLT concentration. (C) The released amounts of MLT from different surfaces at pH=5.5 and pH=7.0. (D) Time-dependent release profile of MLT under different conditions. (Error bars: standard deviation,  $n = 3$ ).
